# Supplementary material
Source: PubMed Central journal article supplement (PMC6095720)
Supplement: NIHMS974550-supplement-1.pdf [file NIHMS974550-supplement-1.pdf]

Figure s1

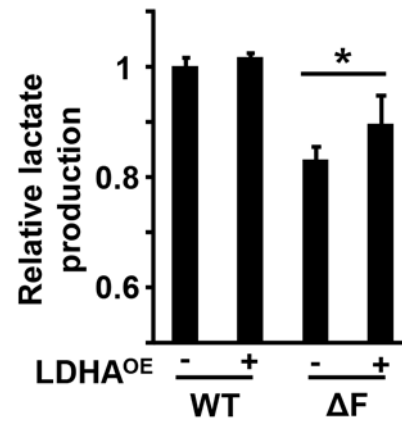

**Fig. S1. Overexpression of LDHA partially restores lactate production in MEF<sup>ΔF</sup> cells.**

Relative lactate production. Data represent mean and standard deviation from triplicate samples. WT, wildtype MEF; ΔF, MEF<sup>ΔF</sup>; LDHA<sup>OE</sup>, LDHA overexpression; \*, P<0.05.

Figure s2

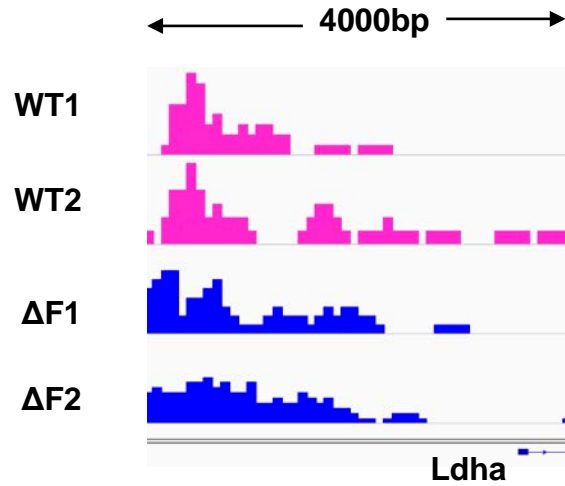

**Fig. S2. Ablation of FGF signaling does not affect DNA methylation in the *Ldha* promoter.** The same high-throughput sequencing of immunoprecipitated DNA as in Fig. 3 was analyzed and the level of methylation at CpG islands in the *Ldha* promoter region is shown. WT, wildtype MEF; ΔF, MEF<sup>ΔF</sup>.

Figure s3

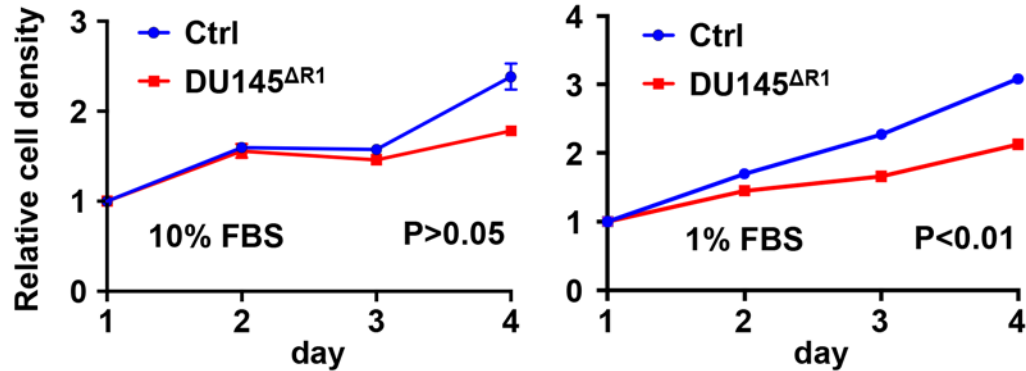

**Fig. S3. Effect of Fgfr1 ablation on the growth of DU145 cells.** DU145 cells ( $1.0 \times 10^3$  per well) were seeded in 96 well plates in the DMEM medium with 10% or 1% FBS as indicated. The cell density was assessed daily after the inoculation with the CCK-8 kit as described in the Materials and Methods. No significant difference were observed in the 10% FBS group. However, in the 1% FBS group, control DU145 cells grew faster than FGFR1<sup>null</sup> DU145 cells. Ctrl, DU145 cells,  $\Delta$ R1, Fgfr1<sup>null</sup> DU145 cells

Figure s4

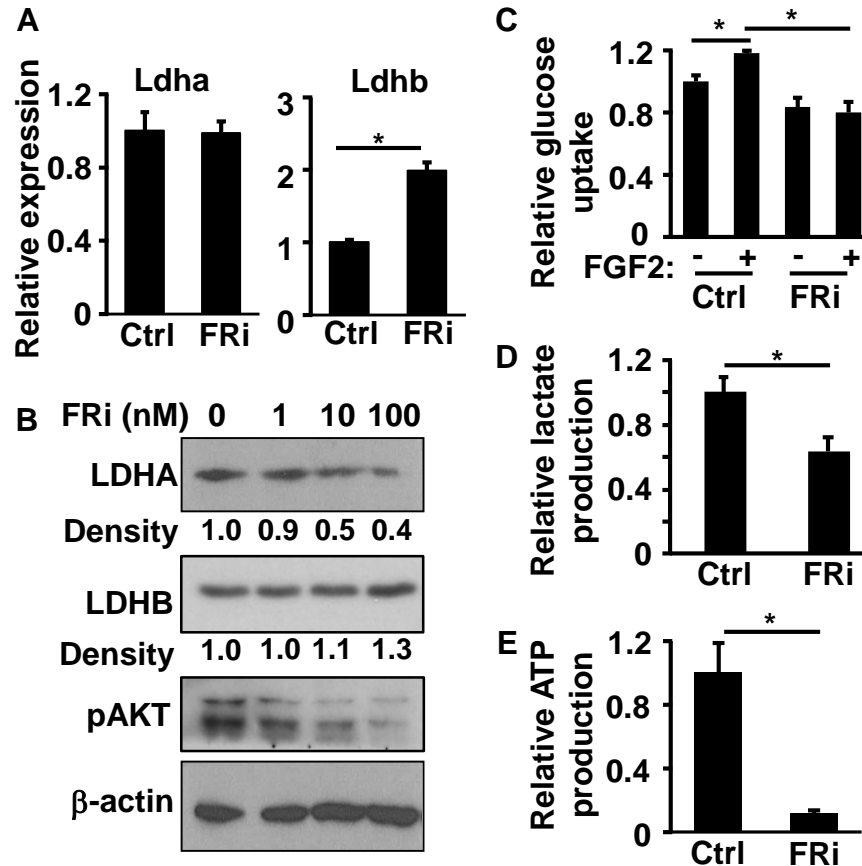

**Fig. S4. Inhibition of FGF signaling suppresses aerobic glycolysis in DU145 cells.** **A.** DU145 cells were treated with 100 nM AZD4547 for 24 hours and the expression of LDH mRNA was analyzed by Real-time RT-PCR. **B.** DU145 cells were treated with the indication concentration of AZD4547 for 24 hours and expression of LDH isoforms were analyzed with western blot analyses. **C-E.** DU145 cells were treated AZD4547 for 24 hours and the glucose uptake (**C**), lactate production (**D**), and ATP production (**E**) were measured. Ctrl, solvent only; FRI, FGFR inhibitor AZD4547.

Figure s5

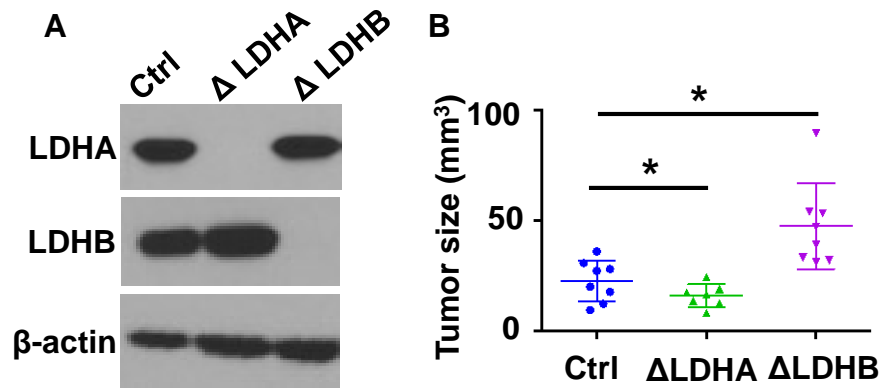

**Fig. S5. LDHA ablation reduces, and LDHB ablation enhances, the tumorigenicity of PC3 cells.** **A**, Western blot of the expression of LDHA and LDHB. **B**, Xenografts derived from control PC3, PC3 $\Delta$ Ldha, or PC3 $\Delta$ Ldhb cells. The sizes of the xenografts were measured two weeks after the inoculation. The average xenograft size was calculated from all individual xenografts and is presented as mean  $\pm$  sd.  $\Delta$ LDHA, PC3 $\Delta$ Ldha;  $\Delta$ LDHB, PC3 $\Delta$ Ldhb; Ctrl, control PC3 cells.

**Figure s6**

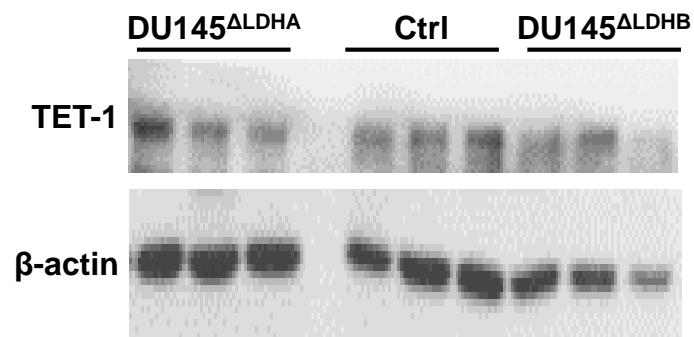

**Fig. S6. Expression of TET1 in DU145<sup>ΔLdha</sup> and DU145<sup>Δldhb</sup> xenografts.** Western blot of the expression of TET1 in xenografts derived from the indicated DU145 cells. β-actin was used as loading controls; Ctrl, DU145 cells.

Figure s7

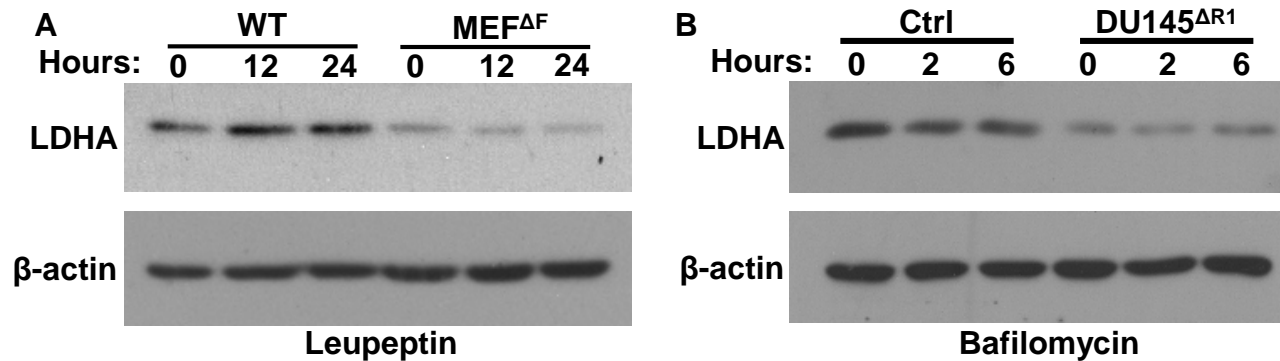

**Fig. S7. Suppression of protease or autophagy does no change LDHA degradation in cells with or without FGFR1.** MEF (A) or DU145 (B) cells were treated with leupeptin or bifilobyin, respectively for the indicated hours and the abundance of LDHA was assessed by western blot.  $\beta$ -actin was used as a loading control; WT, wildtype MEF; Ctrl, DU145 cells.

Figure s8

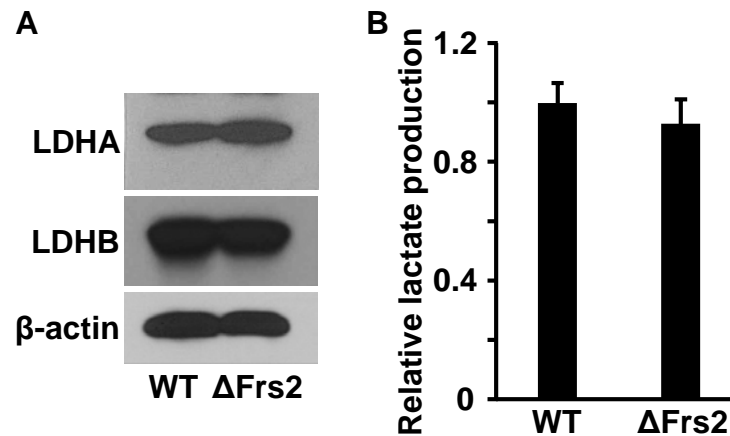

**Fig. S8. *Frs2 $\alpha$*  ablation does not affect LDH isoform expression and lactate production in MEFs.** **A**, Western blot of LDHA and LDHB expression. **B**, Relative lactate production of the indicated MEF was measured as described in the Material and Method section.  $\beta$ -actin was used as loading controls. WT, wildtype MEF;  $\Delta$ Frs2, *Frs2*<sup>null</sup> MEF.
